# Supplementary material for: Syngas molecules as probes for defects in 2D hexagonal boron nitride: their adsorption and vibrations
Source: Royal Society of Chemistry journal article supplement (doi:10.1039/d0cp05943a), 2021-01-01
Supplement: d0cp05943a1.pdf [file d0cp05943a1.pdf]

# Electronic Supplementary Information for Syngas Molecules as Probes for Defects in 2D Hexagonal Boron Nitride: their Adsorption and Vibrations

Authors:

**Tao Jiang,<sup>a</sup> Duy Le,<sup>a,b</sup> Takat B. Rawal,<sup>a,†</sup> and Talat S. Rahman<sup>a,b,\*</sup>**

<sup>a</sup>Department of Physics, University of Central Florida, Orlando, FL, 32816 USA

<sup>b</sup>Renewable Energy and Chemical Transformations Cluster, University of Central Florida,  
Orlando, FL, 32816 USA

<sup>†</sup>Present address: Department of Physics, University of Houston, Houston, TX 77204 USA

\*Email: talat.rahman@ucf.edu

To ensure that sampling of the total energy of the system at a single k-point ( $\Gamma$  point of the two-dimensional Brillouin zone) does not lead to systematic errors in the calculated energetics, as a test case, we have carried out calculations of the total energy of the system with the N vacancy,  $V_N$ , with and without adsorbed CO, for three additional sets of k-point sampling:  $2 \times 2 \times 1$ ,  $3 \times 3 \times 1$ ,  $4 \times 4 \times 1$ . The results summarized below in Table S1 show the binding energy of CO calculated from the ionically relaxed structures differ by about 0.007 eV (7 meV). In fact, the  $\Gamma$  point results for total energy of *dh*-BN with  $V_N$ , without CO, is also within 0.007 eV, as compared to that obtained with higher number of k-points. The difference is even smaller for system with adsorbed CO. We thus find the computationally efficient  $\Gamma$  point sampling to be reasonable for obtaining binding energies and other energetics, within two decimal point accuracy.

Table S1. K-points Sampling Test based on  $V_N$  and CO on  $V_N$

| K-point sampling                   | Total energy of $V_N$ (eV) | Total energy of CO on $V_N$ (eV) | Binding Energy (eV) |
|------------------------------------|----------------------------|----------------------------------|---------------------|
| $1 \times 1 \times 1$ ( $\Gamma$ ) | -19725.44890               | -20566.21585                     | -3.451              |
| $2 \times 2 \times 1$              | -19725.44196               | -20566.21506                     | -3.457              |
| $3 \times 3 \times 1$              | -19725.44217               | -20566.21538                     | -3.457              |
| $4 \times 4 \times 1$              | -19725.44219               | -20566.21536                     | -3.457              |

Additionally, the calculated reaction pathways for both CO and CO<sub>2</sub> to transit from their physisorbed to chemisorbed states on SW type defect in *dh*-BN are plotted in Figure S1. The reaction barriers of 0.57 eV for CO (Figure S1a) and 1.71 eV for CO<sub>2</sub> should be gauged with the reverse barriers in mind (0.01 eV for CO and 1.08 eV for CO<sub>2</sub>).

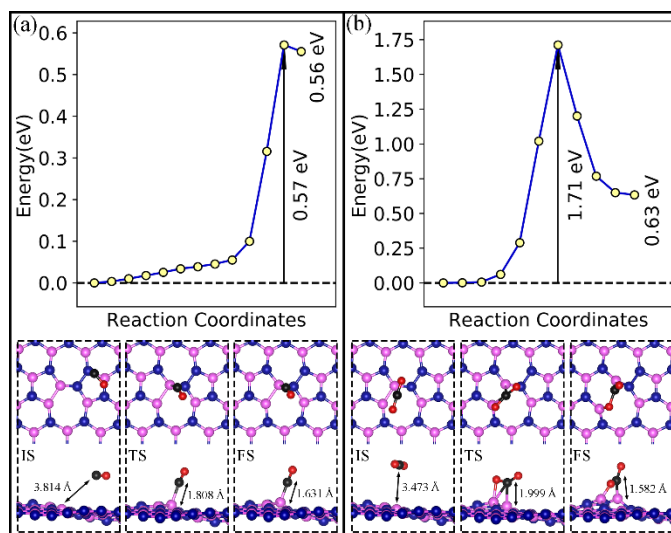

**Figure S1** Reaction pathways from physisorbed to chemisorbed state on SW defect in *dh*-BN: (a) CO (b) CO<sub>2</sub>. In the bottom panel, IS, TS, and FS represent initial, transition and final states, respectively. Blue, pink, black, and red balls represent N, B, C, and O atoms, respectively.
